# Supplementary material
Source: publisher figshare collection journal article supplement (https://acs.figshare.com/ndownloader/files/9339313)
Supplement: Supplementary file 1 [file 9339313]

## Supporting Information

# Environment-Dependent Radiation Damage in Atmospheric Pressure X-ray Spectroscopy

*Robert S. Weatherup<sup>1,2,\*</sup>, Cheng Hao Wu<sup>1</sup>, Carlos Escudero<sup>3</sup>, Virginia Pérez-Dieste<sup>3</sup>, Miquel*

*B. Salmeron<sup>1,4</sup>*

<sup>1</sup>Materials Sciences Division, Lawrence Berkeley National Laboratory, 1 Cyclotron Road,  
Berkeley, California 94720, United States

<sup>2</sup>Department of Chemistry, University of Cambridge, Lensfield Road, Cambridge CB2 1EW,  
UK

<sup>3</sup>ALBA Synchrotron Light Source, Carrer de la Llum 2–26, 08290 Cerdanyola del Vallès,  
Barcelona, Spain

<sup>4</sup>Department of Materials Science and Engineering, University of California, Berkeley,  
United States

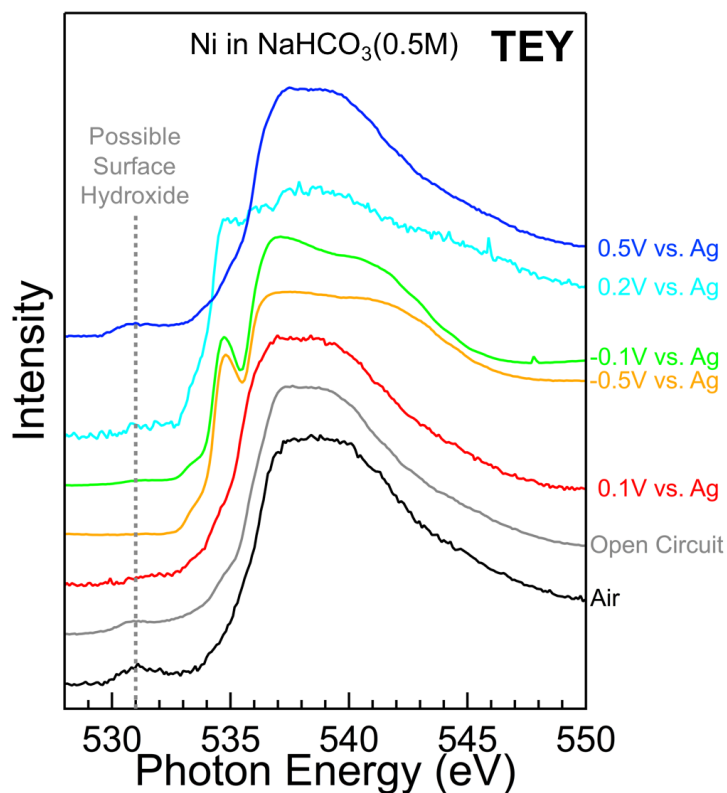

Figure S1. XAS of O K-edge measured with TEY mode for a Ni(50 nm) working electrode in air at atmospheric pressure (black), and in an aqueous NaHCO<sub>3</sub> (0.5 M) solution under open circuit (grey) and while held at the potentials indicated by the colored dots in Figure 1B of the main manuscript. The acquisition time of each spectrum is ~1080s. A small peak is detectable at ~531 eV (vertical dashed line) for all spectra except for that measured at -0.5V, and may be related to the presence of hydroxide at the Ni surface.
